# Supplementary material for: Decoration of chitosan microspheres with Brønsted heteropolyacids and Lewis ion Ti: trifunctional catalysts for esterification to biodiesel
Source: Royal Society of Chemistry journal article supplement (doi:10.1039/c7ra07479d), 2017-01-01
Supplement: c7ra07479d1.pdf [file c7ra07479d1.pdf]

**Supporting information**

**Decoration of chitosan microspheres with Brønsted heteropolyacids and Lewis ion Ti:  
trifunctional catalysts for esterification to biodiesel**

Tong Tong, Yiming Li, Rui Hou, Xiaohong Wang,\* Shengtian Wang

Key Lab of Polyoxometalate Science of Ministry of Education, Northeast Normal University,  
Changchun 130024, P. R. China

Fax: 0086-431-85099759; E-mail: [wangxh665@nenu.edu.cn](mailto:wangxh665@nenu.edu.cn)

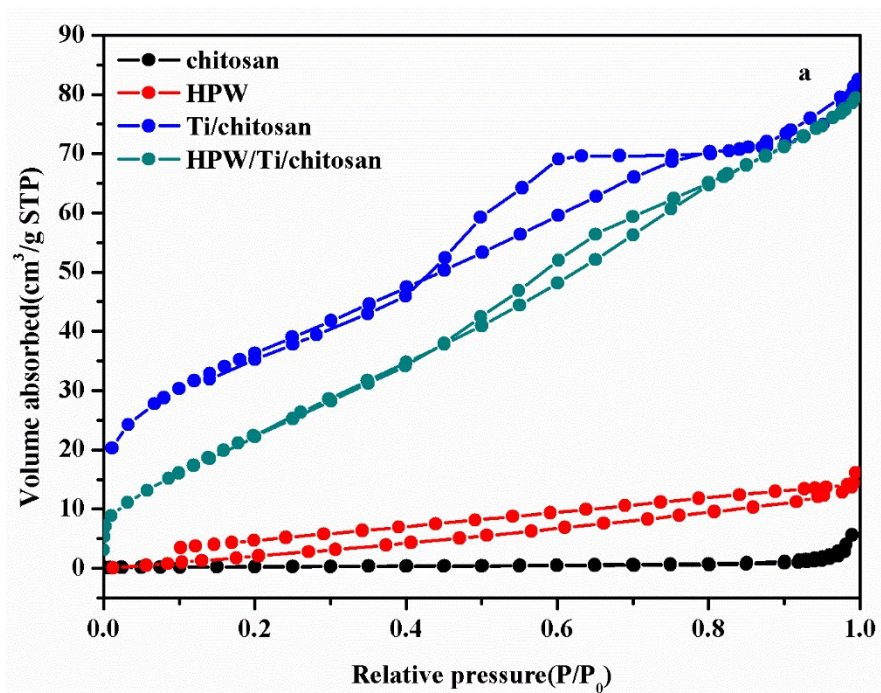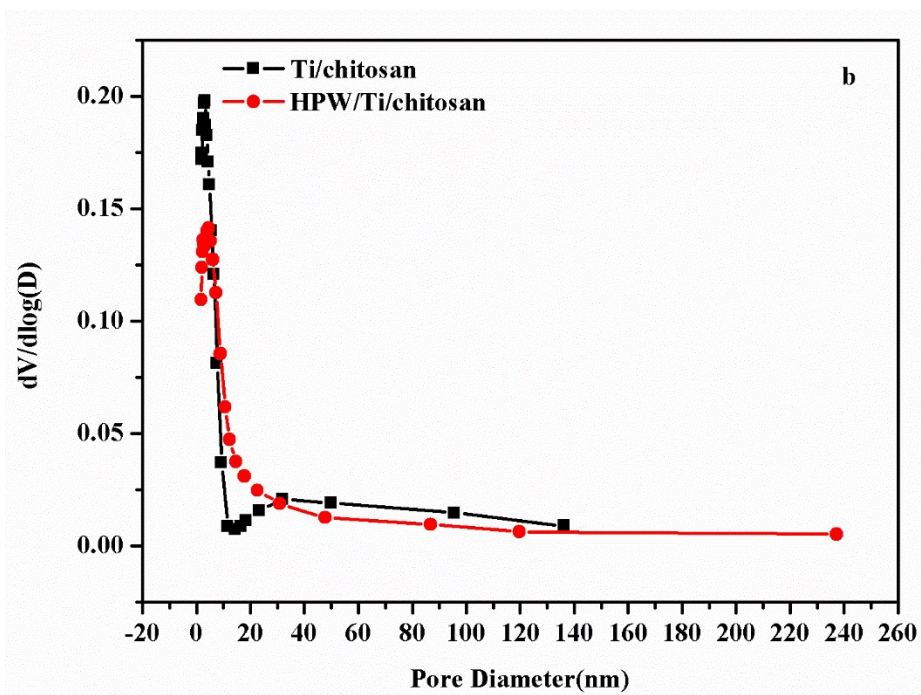

**Fig. S1** Nitrogen adsorption-desorption isotherms (a) and pore diameter distribution (b) of chitosan, HPW, Ti/chitosan and HPW (29 wt%)/Ti/chitosan.

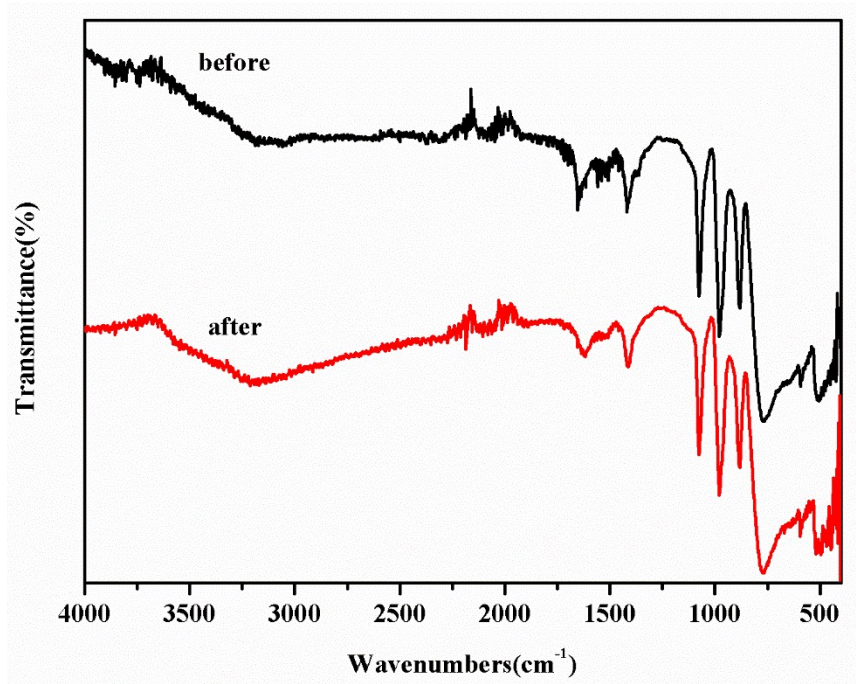

Fig. S2 IR spectra of HPW (29 wt%)/Ti/chitosan before and after reaction.

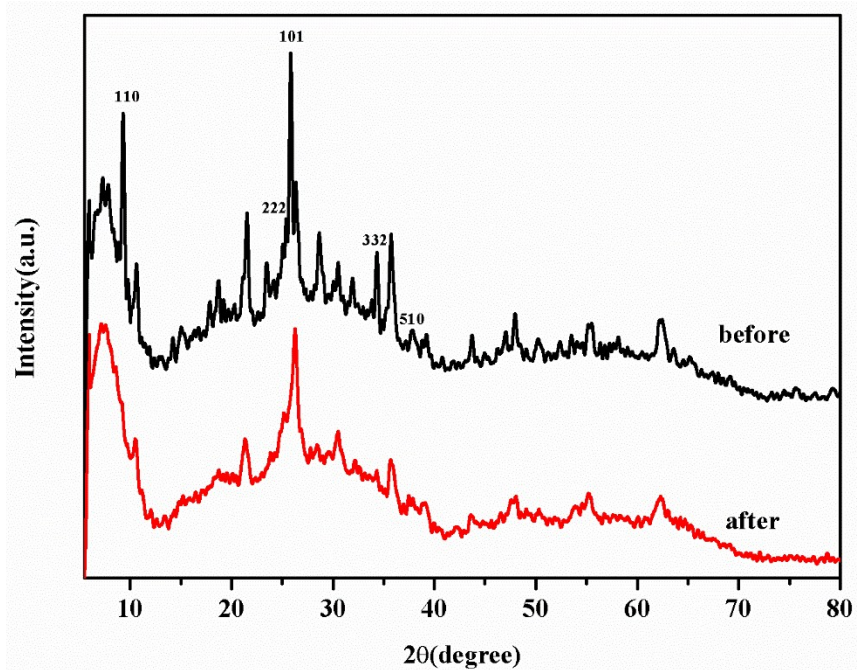

**Fig. S3** X-ray diffraction (XRD) patterns of HPW (29 wt%)/Ti/chitosan before and after reaction.

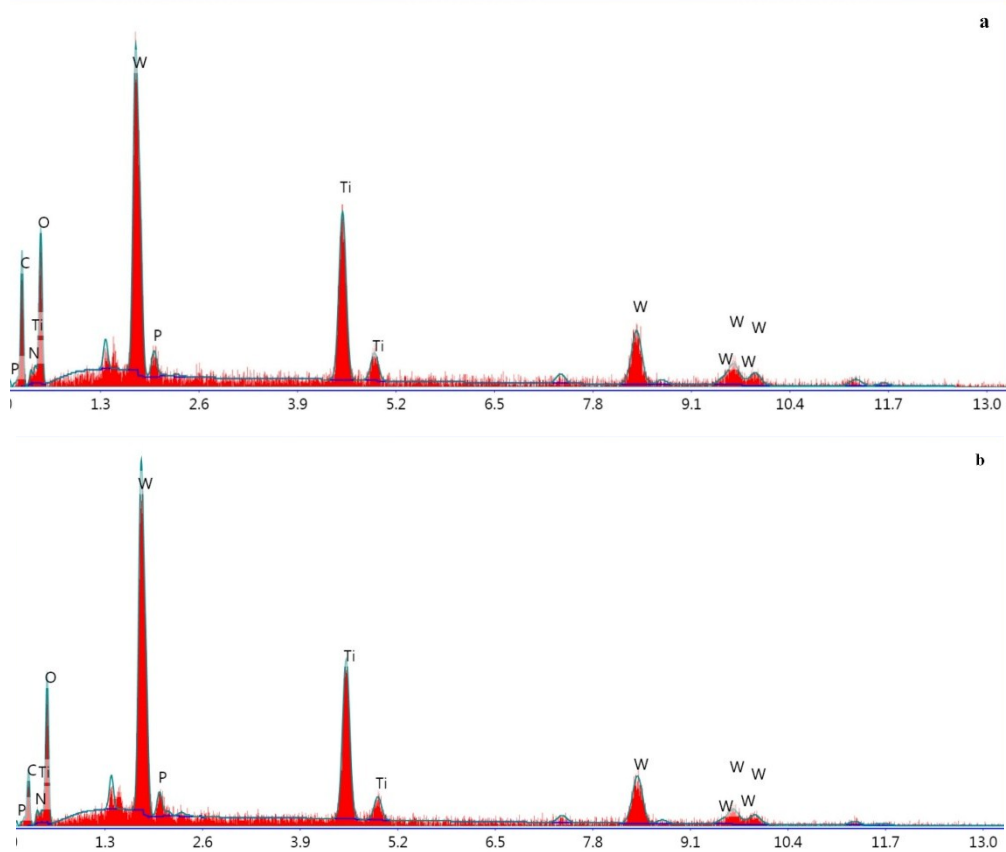

**Fig. S4** Energy Dispersive X-ray spectrometry (EDS) elemental mapping of HPW (29 wt%)/Ti/chitosan (a) before and (b) after reaction.
